# Supplementary material for: Homeobox B9 integrates bone morphogenic protein 4 with inflammation at atheroprone sites
Source: PubMed Central journal article supplement (PMC7243277; doi:10.1093/cvr/cvz235), 2019-08-29
Supplement: cvz235_supplementary_data.pdf [file cvz235_supplementary_data.pdf]

# **Homeobox B9 integrates bone morphogenic protein 4 with inflammation at atheroprone sites.**

**Souilhol C, Gauci I, Feng S, Tardajos Ayllon B, Mahmoud M, Canham L, Fragiadaki M, Serbanovic-Canic J, Ridger V, Evans PC\*.**

Short title: HoxB9 promotes arterial inflammation

Category: Atherosclerosis and Lipid Biology

Total word count: 5876

\* Address correspondence to:

Professor Paul Evans PhD, FESC, FRSB  
Department of Infection, Immunity and Cardiovascular Disease,  
Bateson Centre for Lifecourse Biology,  
INSIGNEO Institute for Cardiovascular Medicine,  
University of Sheffield,  
Sheffield S10 2RX, UK.

Telephone: 0114 2159525

Email: [paul.evans@sheffield.ac.uk](mailto:paul.evans@sheffield.ac.uk)

## SUPPLEMENTARY FIGURES

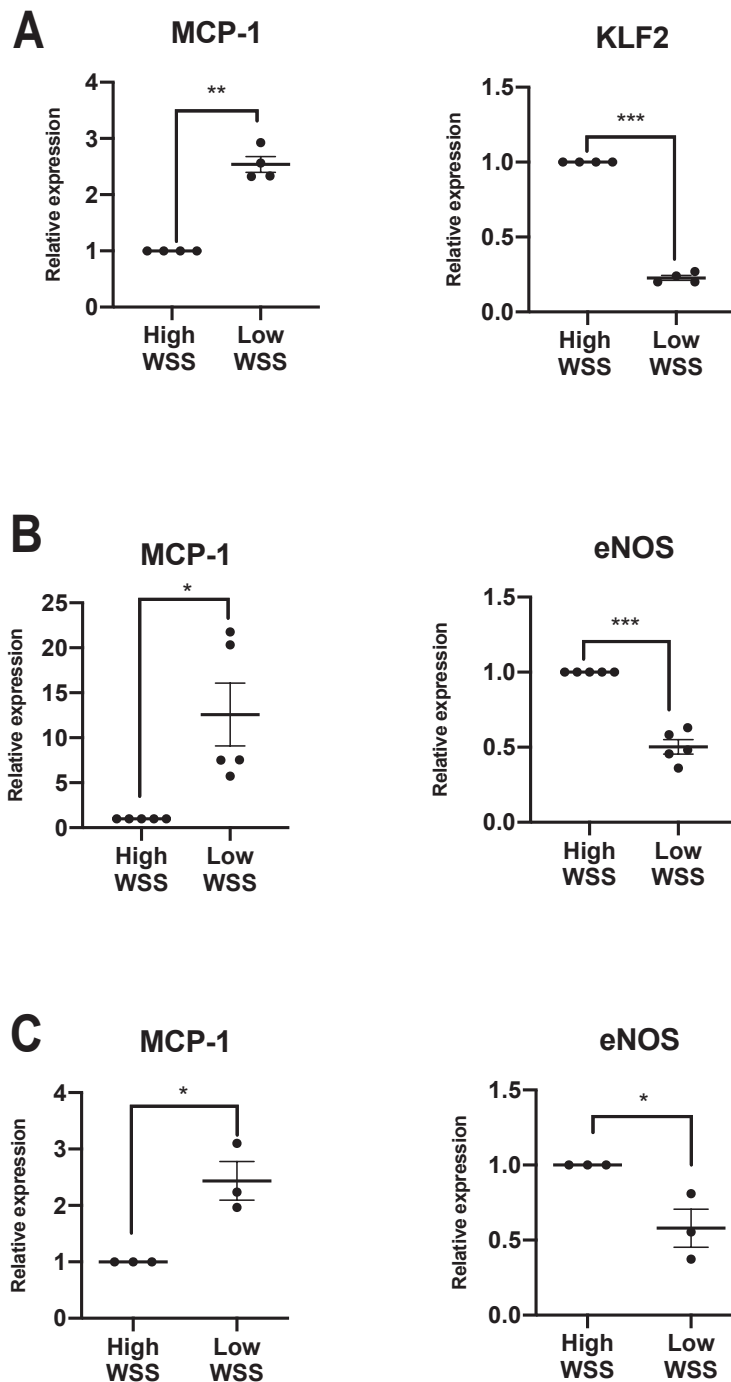

**Supplementary Figure 1. Validation of endothelial responses to shear stress.** (A) PAECs or (B) HUVECs were cultured in 6-well plates and exposed to orbital shaking to generate WSS. After 72 h, cells were isolated from the centre (low WSS) or the periphery (high WSS) of the well. (C) HUVEC were exposed to low or high WSS for 72 h using a parallel-plate system. (A-C) mRNA levels of CCL2, KLF2 or eNOS were quantified by qRT-PCR. Data were pooled from 4 (A), 5 (B) or 3 (C) experiments and mean expression levels are shown with standard deviations. \* $p < 0.05$ , \*\* $p < 0.01$ , \*\*\* $p < 0.001$  using a paired two-tailed t-test.

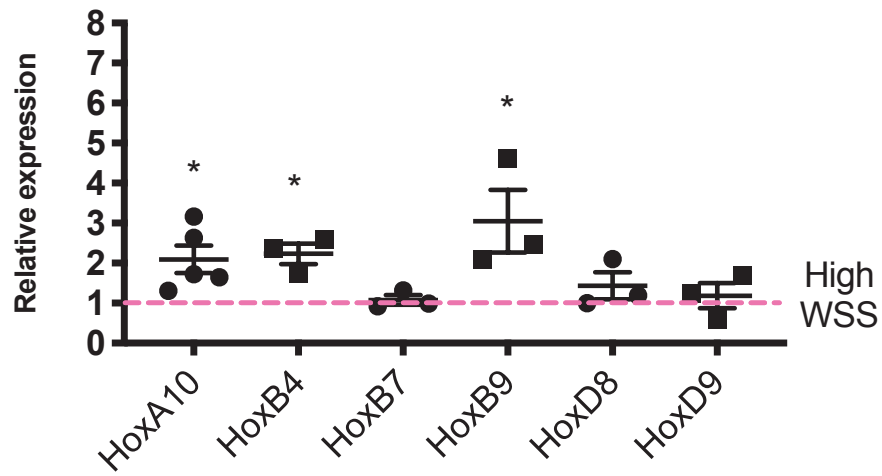

**Supplementary Figure 2. Low WSS generated using a parallel-plate system induces multiple Hox genes.** HUVEC were exposed to low or high WSS for 72 h using a parallel-plate system. After 72 h, Hox gene mRNA levels were quantified by qRT-PCR using gene-specific primers. Data were pooled from 5 independent experiments. Mean expression levels in low WSS conditions were normalised to levels in high WSS (dotted line) and are shown with standard deviations. \* $p < 0.05$ , \*\* $p < 0.01$  using a paired two-tailed t-test.

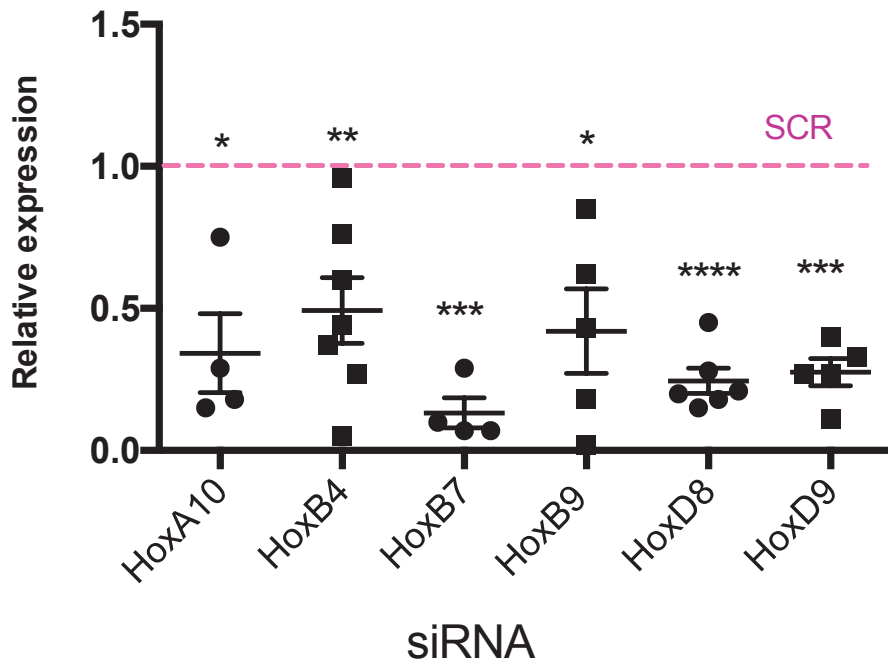

**Supplementary Figure 3. Validation of Hox gene silencing.**

HUVECs were transfected with siRNA targeting specific Hox genes or with scrambled control sequences. Cells were then exposed for 72 h to low WSS using the orbital system. Hox gene mRNA levels were quantified by qRT-PCR using gene-specific primers (HoxA10, N=4; HoxB4, N=7; HoxB7, N=4; HoxB9, N=5; HoxD8, N=6; HoxD9, N=5). Mean expression levels in cells treated with Hox-specific siRNAs were normalised to levels in scrambled controls (dotted line) and are shown with standard deviations. \* $p < 0.05$  using a paired two-tailed t-test.

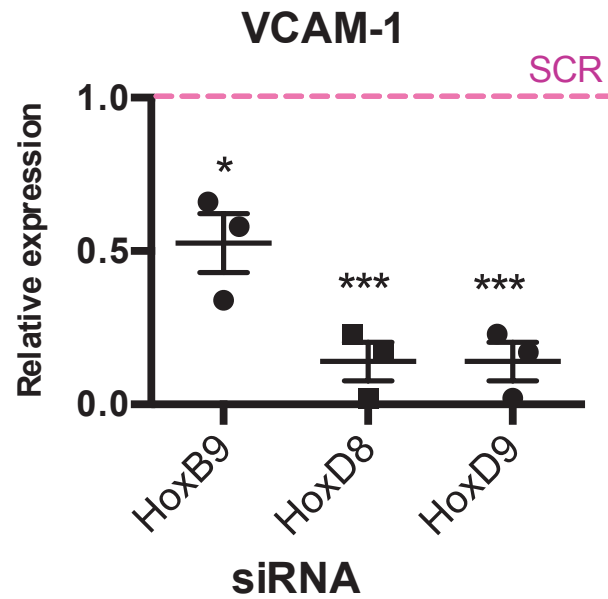

**Supplementary Figure 4. Silencing of HoxB9, HoxD8 or HoxD9 using a second siRNA sequence reduced VCAM-1 expression.**

HUVECs were transfected with siRNA targeting HoxB9, HoxD8 or HoxD9 or with scrambled control sequences. Cells were then exposed for 72 h to low WSS using the orbital system. VCAM-1 mRNA levels were quantified by qRT-PCR. Data were pooled from 3 experiments. Mean expression levels in cells treated with Hox-specific siRNAs were normalised to levels in scrambled controls (dotted line) and are shown with standard deviations. \* $p < 0.05$ , \*\*\* $p < 0.001$  using a paired two-tailed t-test.

**A**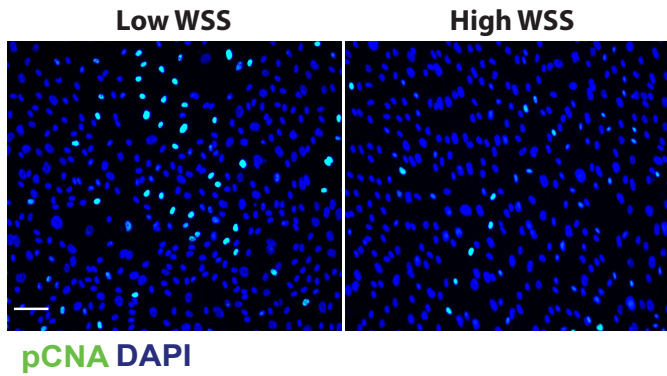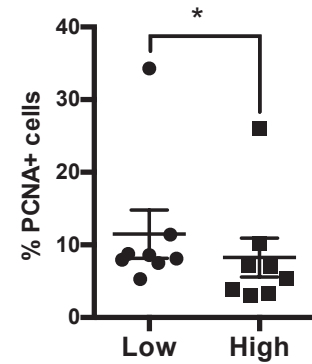**B**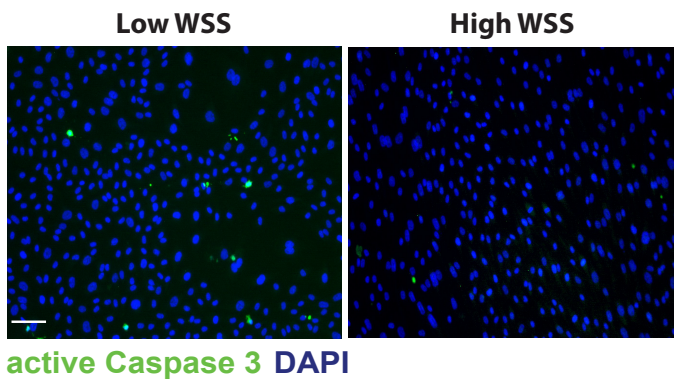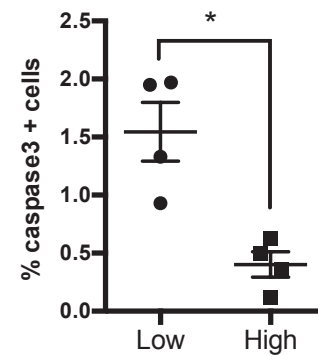

**Supplementary Figure 5. Low shear stress enhanced proliferation and apoptosis in cultured endothelial cells.**

HUVEC were cultured in 6-well plates and exposed to orbital shaking to generate low or high WSS. Proliferation and apoptosis were quantified by immunofluorescent staining using antibodies that detect PCNA or cleaved caspase-3. Bar = 75 $\mu$ m. Frequencies of PCNA-positive (A; N=8 experiments) or apoptotic cells (B; N=4 experiments) were pooled and mean values are shown with standard deviations. \*p<0.05 using a paired two-tailed t-test.

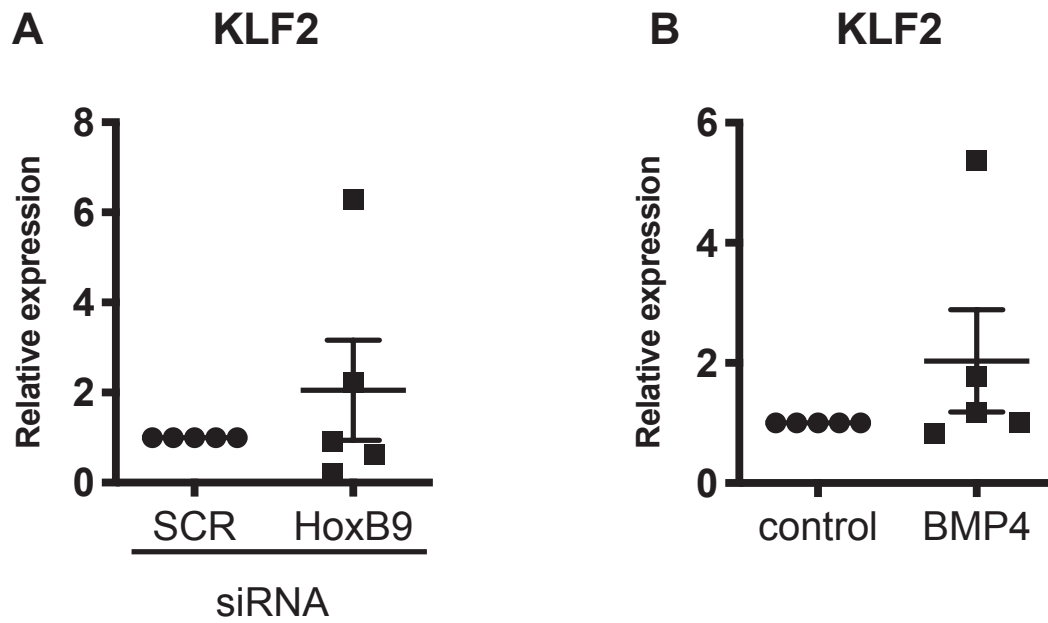

**Supplementary Figure 6: Effect of HoxB9 and BMP4 on KLF2 expression.** (A) HUVEC were transfected with siRNA targeting HoxB9 or with scrambled control sequences and then exposed for 72 h to low WSS. (B) HUVEC cultured under static conditions were treated with 50ng/ml of BMP4 for 72 h. (A, B) mRNA levels of KLF2 was quantified by qRT-PCR. Data were pooled from 5 experiments and mean expression levels are shown with standard deviations.

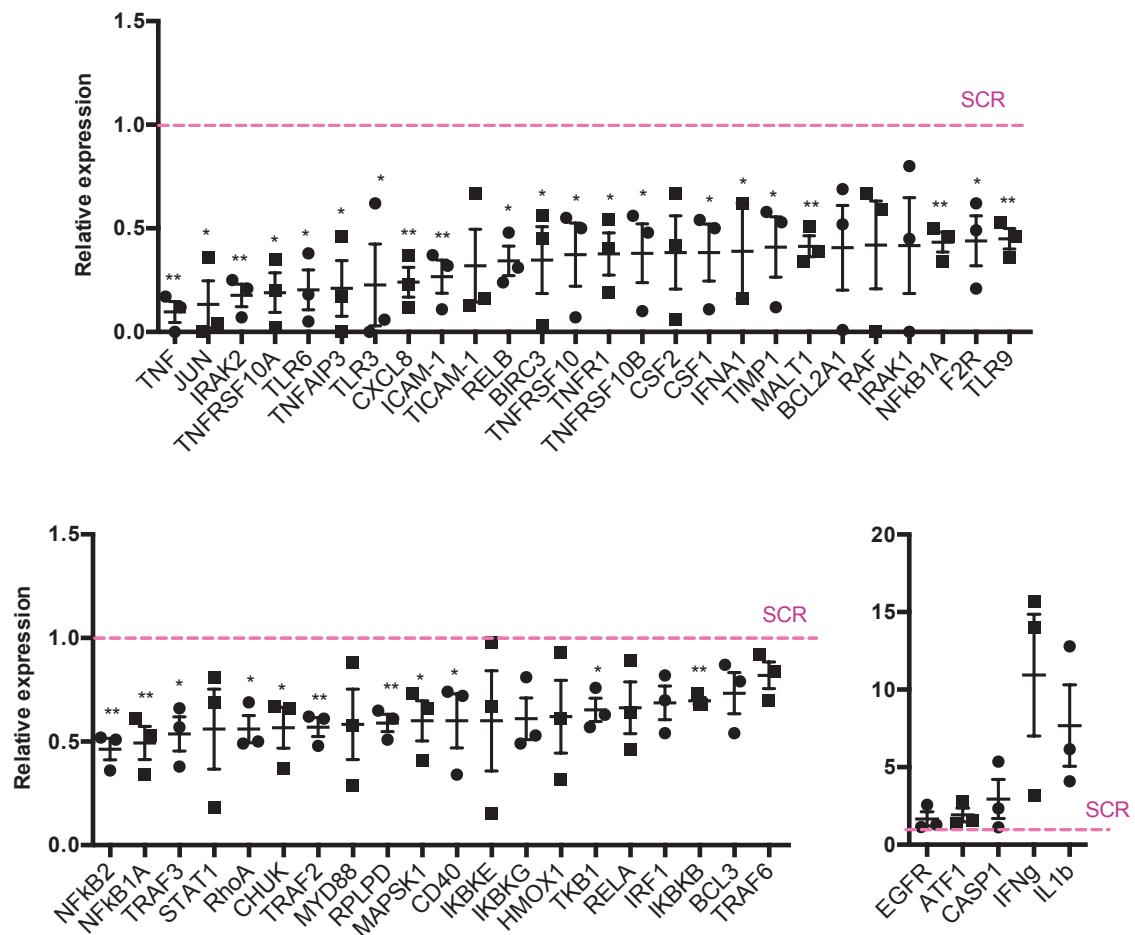

**Supplementary Figure 7: HoxB9 positively regulates multiple pro-inflammatory molecules.** HUVECs were transfected with siRNA targeting HoxB9 or with scrambled control sequences. Cells were then exposed for 72 h to low WSS using the orbital system. The expression levels of multiple transcripts that regulate inflammation were quantified by qRT-PCR array. Fold changes for inflammatory molecules between scramble or HoxB9 siRNA treated HUVEC are shown. \*p<0.05, \*\*p<0.01 using a paired two-tailed t-test.



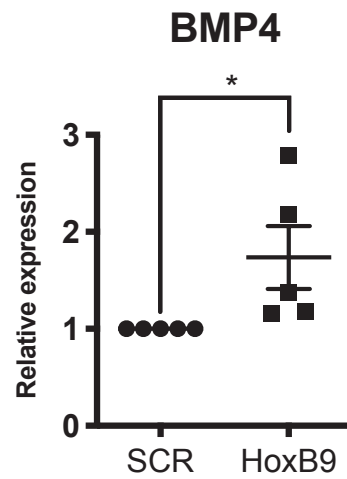

**Supplementary Figure 8: Effect of HoxB9 knock-down on BMP4 expression.** HUVEC were transfected with siRNA targeting HoxB9 or with scrambled control sequences and then exposed for 72 h to low WSS. mRNA levels of BMP4 was quantified by qRT-PCR. Data were pooled from 5 experiments and mean expression levels are shown with standard deviations.

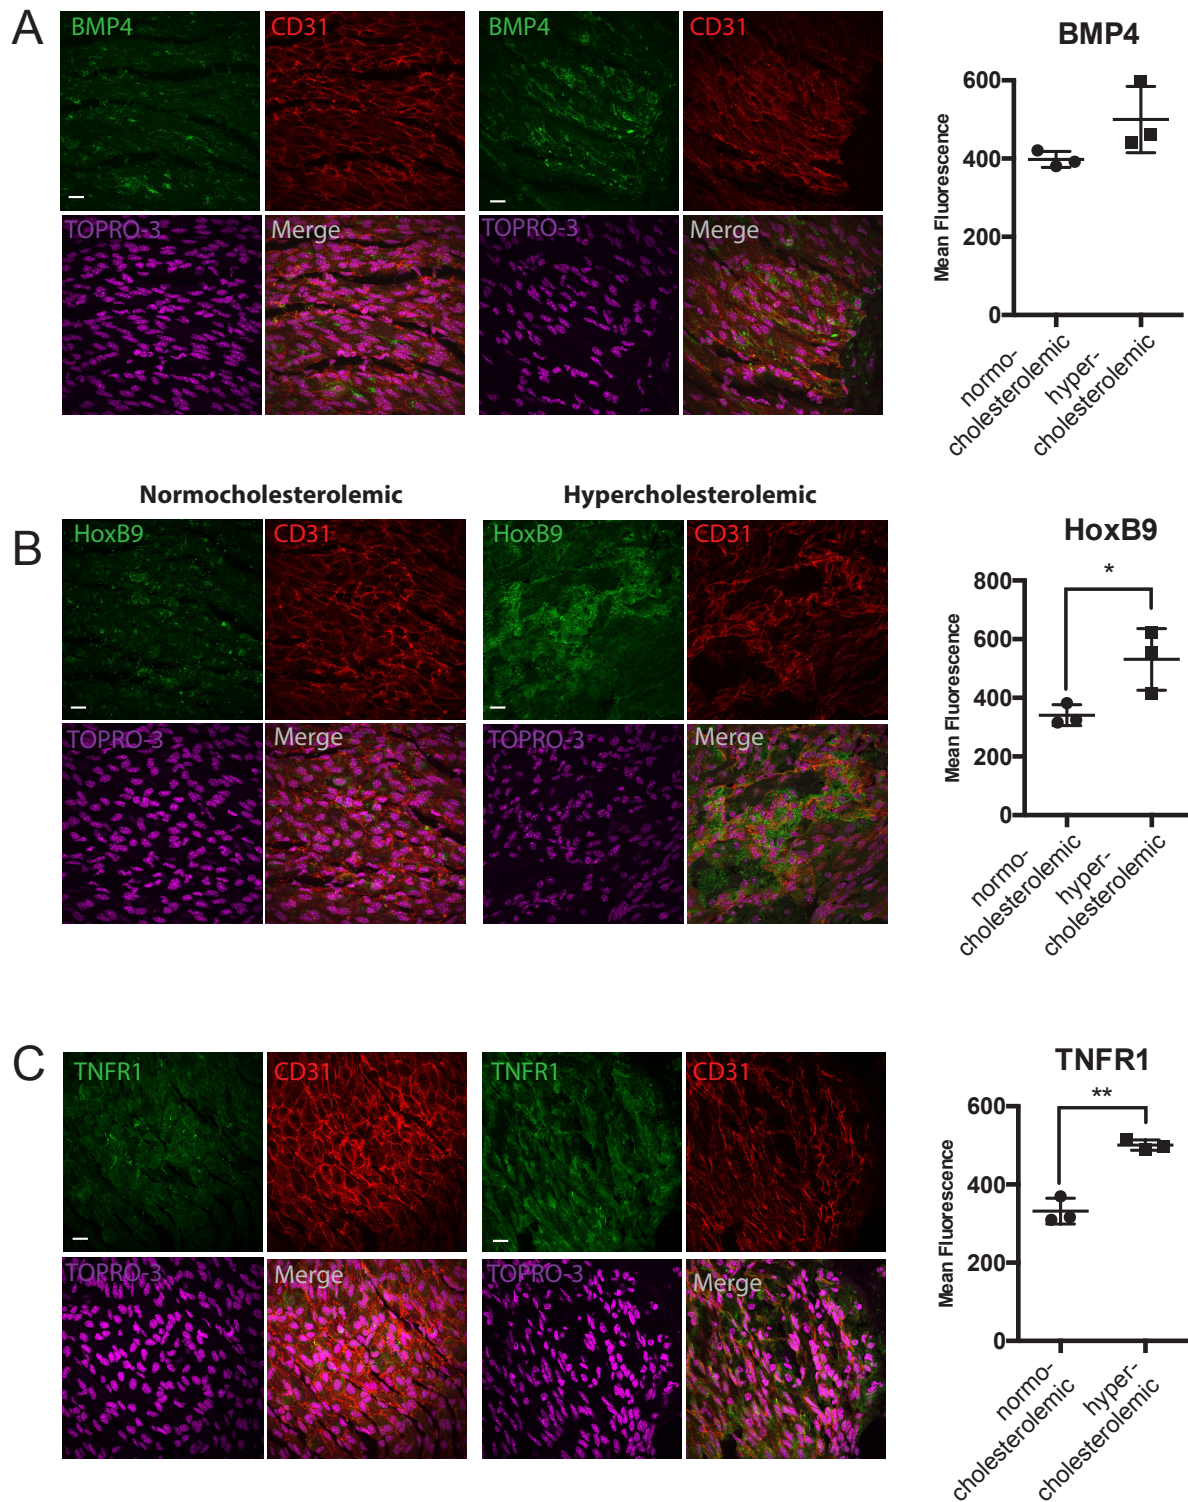

**Supplementary Figure 9: Hypercholesterolemia potentiates the BMP4-HoxB9-TNF pathway at atheroprone sites.** The expression of BMP4, HoxB9 and TNFR1 was quantified at the inner curvature (low WSS) of the aortic arch in normocholesterolemic (APOE<sup>-/-</sup> mice under normal diet) and hypercholesterolemic mice (APOE<sup>-/-</sup> mice under high fat diet for 6 weeks) by *en face* staining (green). EC were identified using anti-CD31 antibodies (red) and nuclei were co-stained using TOPRO3 (purple). N=3. Bar = 10 $\mu$ m. \*\*p<0.01, \*\*\*p<0.001 using an unpaired two-tailed t-test.

## SUPPLEMENTARY TABLES

**Supplementary Table 1 Antibodies: suppliers and concentrations used.**

| Antibody   | Company              | Use      | Final Concentration or dilution ratio |
|------------|----------------------|----------|---------------------------------------|
| HOXB9      | Santa Cruz sc-46129  | IF       | 1:100                                 |
| E-Selectin | Novus NBP1-45545     | WB<br>IF | 0.5-4µg/ml<br>2µg/ml                  |
| IκBα       | Cell signaling 9242  | WB       | 0.1µg/ml                              |
| Calnexin   | BD 610524            | WB       | 0.3µg/ml                              |
| VCAM-1     | Novus NBP1-95622     | WB       | 1:1000-10000                          |
| PDHX       | Santa-Cruz sc-393644 | WB       | 0.2µg/ml                              |
| TNFR1      | Abcam ab19139        | WB<br>IF | 1µg/ml<br>5µg/ml                      |
| TNF        | Abcam ab19139        | WB<br>IF | 1µg/ml<br>2µg/ml                      |
| RelA       | Santa Cruz sc-372    | IF       | 1µg/ml                                |
| CDH5       | BD Bioscience 555661 | IF       | 1µg/ml                                |
| pCNA       | Abcam Ab15497        | IF       | 5µg/ml                                |
| aCasp3     | Cell Signaling 9661S | IF       | 2µg/ml                                |
| BMP4       | Santa Cruz Sc6896    | IF       | 1µg/ml                                |
| CD31       | Biolegend 102513     | IF       | 5µg/ml                                |

WB, Western blotting; IF, immunofluorescence

## Supplementary Table 2 siRNA sequences

| Gene                                               | Catalogue number |
|----------------------------------------------------|------------------|
| ON-TARGETplus human HoxA1 (3198)siRNA- smart pool  | L-077464-00-0005 |
| ON-TARGETplus human HoxA9 (3205)siRNA- smart pool  | L-006337-00-0005 |
| ON-TARGETplus human HoxA10 (3206)siRNA- smart pool | L-006336-00-0005 |
| ON-TARGETplus human HoxB4 (3214)siRNA- smart pool  | L-012892-01-0020 |
| ON-TARGETplus human HoxB7 (3217)siRNA- smart pool  | L-010515-02-0005 |
| ON-TARGETplus human HoxB9 (3219)siRNA- smart pool  | L-017548-01-0020 |
| ON-TARGETplus human HoxD8 (3234)siRNA- smart pool  | L-013244-00-0005 |
| ON-TARGETplus human HoxD9 (3235)siRNA- smart pool  | L-012494-01-0005 |
| ON-TARGETplus human HoxB9 (3219)siRNA- individual  | J-017548-09-0010 |
| ON-TARGETplus human HoxB9 (3219)siRNA- individual  | J-017548-10-0010 |
| ON-TARGETplus human HoxB9 (3219)siRNA- individual  | J-017548-11-0010 |
| ON-TARGETplus human HoxB9 (3219)siRNA- individual  | J-017548-12-0010 |
| ON-TARGETplus human HoxD8 (3242)siRNA- individual  | J-013244-05-0010 |
| ON-TARGETplus human HoxD8 (3242)siRNA- individual  | J-013244-06-0010 |
| ON-TARGETplus human HoxD9 (3235)siRNA- individual  | J-012494-11-0010 |
| ON-TARGETplus human HoxD9 (3235)siRNA- individual  | J-012494-12-0010 |
| ON-TARGETplus human BMP4 (3219)siRNA- smart pool   | L-011221-00-0005 |

All siRNA were purchased from Dharmacon-Horizon Discovery.

**Supplementary Table 3 PCR primers.**

**Porcine primers:**

| <b>Gene</b>  | <b>Forward</b>             | <b>Reverse</b>              |
|--------------|----------------------------|-----------------------------|
| <b>HoxB4</b> | 5'-TATGTCGACCCAAGTTCCC-3'  | 5'-AAGCTGCTCTCTCGCCTCT-3'   |
| <b>HoxB7</b> | 5'-TCGAGCCGAGTTCCTTCAAC-3' | 5'-TC CAGGGGTAGATCCGGAA-3'  |
| <b>HoxB9</b> | 5'-TGTCCATTTCTGGGACGCTT-3' | 5'-CGGAAGGAAACTTGGCTGGA-3'  |
| <b>HoxD8</b> | 5'-GCCGATTTTTACGACCCAGC-3' | 5'-AGCTGCTTGTGGTCTCATCC-3'  |
| <b>HoxD9</b> | 5'-GGACTGGCTCTGGGTGTTTT-3' | 5'-AAGCTTTTCCCTCCCTGCCAA-3' |
| <b>KLF2</b>  | 5'-CGGCAAGACCTACACAAAGA-3' | 5'-GT TGCAGTGGTAGGGCTTCT-3' |

**Human primers:**

| <b>Gene</b>       | <b>Forward</b>              | <b>Reverse</b>                |
|-------------------|-----------------------------|-------------------------------|
| <b>BMP4</b>       | 5'-TCCACAGCATGGTCTTGAG-3'   | 5'-TGGGATGTTCTCCAGATGTTCT-3'  |
| <b>CCL2</b>       | 5'-GCAGAAGTGGGTTTCAGGATT-3' | 5'-TGGGTTGTGGAGTGAGTGTT-3'    |
| <b>KLF2</b>       | 5'-AGACCACGATCCTCCTTGAC-3'  | 5'-ATCACAAGCCTCGATCCTCT-3'    |
| <b>eNOS</b>       | 5'-CACATGGCCTTGGACTGAA-3'   | 5'-CAGAGCCCTGGCCTTTTC-3'      |
| <b>E-Selectin</b> | 5'-GCTCTGCAGCTCGGACAT-3'    | 5'-GAAAGTCCAGCTACCAAGGGAAT-3' |
| <b>HoxA10</b>     | 5'-CAAGGCAATTCCAAAGGC-3'    | 5'-GCTCTCGAGTAAGGTACATGTTG-3' |
| <b>HoxB4</b>      | 5'-ACGAGTCAGGGGTCGGAAT-3'   | 5'-CATGGAGGGAAGTGGGGTC-3'     |
| <b>HoxB7</b>      | 5'-CTGGATGCGAAGCTCAGG-3'    | 5'-TCTTTCTCCAGCTCCAGGGTCT-3'  |
| <b>HoxB9</b>      | 5'-GAGAGGCCGATCAAACCAA-3'   | 5'-CTACGGTCCCTGGTGAGGTA-3'    |
| <b>HoxD8</b>      | 5'-GCCGATTTTTACGACCCAGC-3'  | 5'-GGAGCTGCTTGTGGTCTCAT-3'    |
| <b>HoxD9</b>      | 5'-GCAGCAACTTGACCCAAACAA-3' | 5'-GT CCAGCTCAAGCGTCTGGTAT-3' |
| <b>ID1</b>        | 5'-CTGCTCTACGACATGAACGGC-3' | 5'-AGACGTGCTGGAGAATCTCCA-3'   |
| <b>VCAM-1</b>     | 5'-CATTGACTTGCAGCACCACA-3'  | 5'-AGATGTGGTCCCCTCATTTCG-3'   |
